# Supplementary material
Source: Research Square preprint supplement (doi:10.21203/rs.3.rs-9447641/v1)
Supplement: Supplementary file 1 [file 826bcc5c1cb2c66f1bcfe374.docx]

**Table 1 Patient characteristics according to severe neutropenia and non-severe neutropenia**

| Cohort | Total (*N*=84) | |  | Non-severe neutropenia (*n* = 24) | |  | Severe neutropenia (n = 60) | |
| --- | --- | --- | --- | --- | --- | --- | --- | --- |
|  | *N* | % |  | *n* | % |  | *n* | % |
| Sex |  |  |  |  |  |  |  |  |
| Male | 4 | 4.8 |  | 2 | 8.3 |  | 2 | 3.3 |
| Female | 80 | 95.2 |  | 22 | 91.7 |  | 58 | 96.7 |
| Age (years) |  |  |  |  |  |  |  |  |
| Median (range) | 62 (33–87) | |  | 60 (39–87) | |  | 63 (33–80) | |
| BMI |  | |  |  | |  |  | |
| Median (range) | 22.7 (14.2-32.8) | |  | 22.9 (18.2-32.8)- | |  | 22.6 (14.2-32.0) | |
| ECOG performance status |  |  |  |  |  |  |  |  |
| ECOG 0 | 42 | 50.0 |  | 8 | 33.3 |  | 34 | 56.7 |
| ECOG 1-2 | 42 | 50.0 |  | 16 | 66.7 |  | 26 | 43.3 |
| Disease setting |  |  |  |  |  |  |  |  |
| Advanced recurrent breast cancer | 46 | 54.8 |  | 12 | 50.0 |  | 34 | 56.7 |
| Metastasis present at diagnosis | 38 | 45.2 |  | 12 | 50.0 |  | 26 | 43.3 |
| Liver metastasis |  |  |  |  |  |  |  |  |
| Yes | 15 | 17.9 |  | 4 | 16.7 |  | 11 | 18.3 |
| No | 69 | 82.1 |  | 20 | 83.3 |  | 49 | 81.7 |
| Combination endocrine therapy |  |  |  |  |  |  |  |  |
| FUL | 41 | 48.8 |  | 11 | 50.0 |  | 30 | 48.3 |
| AI | 41 | 48.8 |  | 12 | 45.8 |  | 29 | 50.0 |
| TAM | 2 | 2.4 |  | 1 | 4.2 |  | 1 | 1.7 |
| Pre-chemotherapy lines |  |  |  |  |  |  |  |  |
| <3 | 66 | 78.6 |  | 18 | 75.0 |  | 48 | 80.0 |
| ≥3 | 18 | 21.4 |  | 6 | 25.0 |  | 12 | 20.0 |
| Baseline chemistry and Hematology |  |  |  |  |  |  |  |  |
| ANC/μL (range) | 3410 (710-10,370) | |  | 4675 (710-10,370) | |  | 3180 (1280-5430) | |
| Platelet 104/μL (range) | 24.7 (12.8-49.9) | |  | 28.0 (18.6-45.3) | |  | 24.2 (12.8-49.9) | |
| Hemoglobin g/dL (range) | 12.5 (7.2-15.6) | |  | 12.3 (8.2-15.6) | |  | 12.5 (7.2-15.4) | |
| Lymphocyte /μL (range) | 1610 (240-3120) | |  | 1530 (270-2480) | |  | 1620 (240-3120) | |
| T-bil mg/dL (range) | 0.5 (0.2-1.4) | |  | 0.5 (0.3-1.0) | |  | 0.5 (0.2-1.4) | |
| LDH U/L (range) | 186 (108-538) | |  | 194 (144-398) | |  | 184 (108-538) | |
| ALT U/L (range) | 18 (6-198) | |  | 19 (8-198) | |  | 18 (6-106) | |
| BUN mg/dL (range) | 14 (3-39) | |  | 15 (7-21) | |  | 13 (3-39) | |
| SrCr mg/dL (range) | 0.65 (0.41-1.97) | |  | 0.66 (0.42-1.06) | |  | 0.64 (0.41-1.97) | |
| Albumin g/dL (range) | 4.1 (2.9-4.8) | |  | 4.0 (3.4-4.6) | |  | 4.1 (2.9-4.8) | |

Data of Age, BMI, ANC, Hemoglobin, Albumin, ALT and Serum creatinine are shown as median values and ranges

Other data in the table represent the number of patients and data in the parentheses is the %

*BMI body mass index, ANC absolute neutrophil count, T-bil Total bilirubin, LDH Lactate dehydrogenase, ALT alanine aminotransferase,BUN Blood urea nitrogen, SrCr Serum creatinine,*

**Table 2** Association between severe neutropenia and genotypes by univariate analysis

|  | Severe neutropenia | OR | 95%CI | *p*-value |
| --- | --- | --- | --- | --- |
|  | n (%) |  |  |  |
| ***ABCB1* rs1128503C>T** |  |  |  |  |
| Dominant |  |  |  |  |
| CC (n=10) | 8 (80.0) | 1.683 | 0.301-17.525 | 0.717 |
| CT and TT (n=74) | 52 (70.3) |  |  |  |
| Recessive |  |  |  |  |
| TT (n=39) | 27 (69.2) | 0.820 | 0.285-2.357 | 0.809 |
| CT and CC (n=45) | 33 (73.3) |  |  |  |
| ***ABCB1* rs2032582G>T/A** |  |  |  |  |
| Dominant |  |  |  |  |
| GG (n=14) | 11 (78.6) | 1.564 | 0.361-9.616 | 0.748 |
| Non-GG (n=70) | 49 (70.0) |  |  |  |
| Recessive |  |  |  |  |
| TT, TA and AA (n=27) | 17 (63.0) | 1.793 | 0.591-5.373 | 0.302 |
| Others (n=57) | 43 (75.4) |  |  |  |
| ***ABCB1* rs1045642C>T** |  |  |  |  |
| Dominant |  |  |  |  |
| CC (n=26) | 20 (76.9) | 1.493 | 0.470-5.331 | 0.603 |
| CT and TT (n=58) | 40 (69.0) |  |  |  |
| Recessive |  |  |  |  |
| TT (n=18) | 11 (61.1) | 0.549 | 0.162-1.955 | 0.377 |
| CT and CC (n=66) | 49 (74.2) |  |  |  |
| ***ABCG2* rs2231137>A** |  |  |  |  |
| Dominant |  |  |  |  |
| GG (n=55) | 37 (67.3) | 0.540 | 0.152-1.693 | 0.314 |
| GA and AA (n=29) | 23 (79.3) |  |  |  |
| Recessive |  |  |  |  |
| AA (n=1) | 1 (100.0) | NE | NE | 1.000 |
| GA and GG (n=83) | 59 (71.1) |  |  |  |
| ***ABCG2* rs2231142C>A** |  |  |  |  |
| Dominant |  |  |  |  |
| CC (n=34) | 24 (70.6) | 0.934 | 0.323-2.769 | 1.000 |
| CA and AA (n=50) | 36 (72.0) |  |  |  |
| Recessive |  |  |  |  |
| AA (n=11) | 11 (100.0) | NE | NE | 0.029 |
| CA and CC (n=73) | 49 (67.1) |  |  |  |
| ***CYP3A4* rs2242480G>A** |  |  |  |  |
| Dominant |  |  |  |  |
| GG (n=52) | 37 (71.2) | 0.966 | 0.317-2.823 | 1.000 |
| GA and AA (n=32) | 23 (71.9) |  |  |  |
| Recessive |  |  |  |  |
| AA (n=7) | 3 (42.9) | 0.268 | 0.036-1.733 | 0.099 |
| GA and GG (n=77) | 57 (74.0) |  |  |  |
| ***CYP3A5* rs776746*A*>G)** |  |  |  |  |
| Dominant |  |  |  |  |
| GG (n=52) | 39 (75.0) | 1.563 | 0.532-4.561 | 0.457 |
| GA and AA (n=32) | 21 (65.6) |  |  |  |
| Recessive |  |  |  |  |
| AA (n=6) | 2 (33.3) | 0.177 | 0.015-1.340 | 0.053 |
| GA and GG (n=78) | 58 (74.4) |  |  |  |

Abbreviations; OR, odds ratio; CI confidence intervals,

**Table 3** Multivariate analysis of associations between severe neutropenia and clinical variables

|  | OR | 95%CI | *p* -value |
| --- | --- | --- | --- |
| ANC: ≦4510 | 16.249 | 4.450-77.025 | <0.001* |
| PLT: ≦27.7 | 1.369 | 0.340-5.037 | 0.644 |
| PS: 1−2 | 0.685 | 0.183-2.509 | 0.564 |
| *ABCG2 rs2231142*C>A: AA | 19.198 | 1.464-3017.494 | 0.019* |
| *CYP3A4* rs2242480G>A: AA | 3.863 | 0.229-71.382 | 0.344 |
| *CYP3A5 rs776746*G>A: AA | 0.123 | 0.006-2.083 | 0.134 |

Abbreviations; OR, odds ratio; CI confidence intervals, ANC, absolute neutrophil count; PLT, platelet; PS, performance status
